# Supplementary material for: Complex periprosthetic wound coverage in patients undergoing revision total knee arthroplasty: a single plastic surgeon study
Source: PubMed Central journal article supplement (PMC11602818; doi:10.1007/s00402-024-05240-6), 2024-04-25
Supplement: 402_2024_5240_MOESM5_ESM.pdf [file 402_2024_5240_MOESM5_ESM.pdf]

# INDIVIDUAL CONFLICT OF INTEREST STATEMENT

## *American Association of Hip and Knee Surgeons*

(Adopted from the American Academy of Orthopaedic Surgeons disclosure statement)

The following form **must be filled out completely and submitted by each author (example, 6 authors, 6 forms).**  
**All items require a response. If there is no relevant disclosure for a given item, enter "None."**

*"Complex Periprosthetic Wound Coverage in Patients Undergoing Revision Total Knee Arthroplasty: A Single Plastic Surgeon Study"*

1. Royalties from a company or supplier (The following conflicts were disclosed)  
Lima Corporate
2. Speakers bureau/paid presentations for a company or supplier (The following conflicts were disclosed)  
Zimmer Biomet, Lima Corporate
- 3A. Paid employee for a company or supplier (The following conflicts were disclosed)  
none
- 3B. Paid consultant for a company or supplier (The following conflicts were disclosed)  
Depuy Synthes, Intellijoint Surgical, Lima Corporate, Zimmer Biomet
- 3C. Unpaid consultants for a company or supplier (The following conflicts were disclosed)  
none
3. Stock or stock options in a company or supplier (The following conflicts were disclosed)  
Intellijoint Surgical
4. Research support from a company or supplier as a Principal Investigator (The following conflicts were disclosed)  
Zimmer Biomet, Intellijoint Surgical
5. Other financial or material support from a company or supplier (The following conflicts were disclosed)  
none
6. Other financial or material support from a company or supplier (The following conflicts were disclosed)  
none
7. Royalties, financial or material support from publishers (The following conflicts were disclosed)  
none
8. Medical/Orthopaedic publications editorial/governing board (The following conflicts were disclosed)  
None
9. Board member/committee appointments for a society (The following conflicts were disclosed)  
none

**Each author must sign AND print or type his/her name, date and submit a separate form**

In addition, one BLINDED Conflict of Interest form (no author names used) should be submitted per manuscript with all author disclosures.

Peter Sculco

*Peter Sculco*

01/23/2023

---

Author Name (Print or Type)

Author Signature

Date
